# Supplementary material
Source: Springer Nature journal article supplement (https://www.springermedizin.de/resource/supplementary/13049_2010_251_MOESM1_ESM.pdf/9666104)
Supplement: MOESM1 [file 9666104]

## **Composition of the Trauma Team**

The Core Trauma Team:

Team Leader

Anaesthetist

Anaesthetic Assistant

General Surgeon

Orthopaedic Surgeon

Emergency Room Physician

Two Nurses. (Three if no anaesthetic assistant)

Radiographer

Scribe (Nurse or doctor)

Additional Essential Staff:

Haematologist and Biochemist

Blood Bank

Porters

Additional Optional Staff (need identified during primary survey):

Neurosurgeon

Thoracic Surgeon

Plastic Surgeon

Radiologist
